# Supplementary material
Source: publisher site journal article supplement (https://www.degruyter.com/publication/journal_key/ENG/downloadAsset/ENG_BCEE5%202023.pdf)
Supplement: Supplementary file 1 [file ENG_BCEE5%202023.pdf]

# The 5th International Conference on Buildings, Construction and Environmental Engineering (BCEE5)

21-23 NOVEMBER 2023

Civil Engineering Department, University of Technology-Iraq,  
Al-Senaa St., Baghdad, Iraq.

## GUEST EDITOR

---

**Prof. Dr. Mohammed Y. Fattah**, University of Technology, Baghdad, Iraq.

**Prof. Dr. Faleh Sawair**, University of Jordan, Amman, Jordan.

**Assist. Prof. Layth Abdulrasool Alasadi**, University of Kufa, Najaf, Iraq.

## DESCRIPTION

---

Following the previous releases of the first, second, third and fourth International Conferences on Buildings, Construction and Environmental Engineering in Baghdad, American University of Beirut in Lebanon and Shurm Elsheikh, Egypt, Istanbul Technical University in Istanbul, Turkey, It is our pleasure to announce the next conference to be organized jointly between University of Technology - Iraq and The University of Jordan, Amman - Jordan

## TOPICS

---

- ▶ Sustainable Structural Systems Engineering
- ▶ Earthquake Engineering.
- ▶ Sustainable Construction Materials.
- ▶ Construction Engineering and Management.
- ▶ Geotechnical and Geo-environmental Engineering.
- ▶ Transportation and Pavement Engineering.
- ▶ Water Resources Engineering
- ▶ Environmental Engineering
- ▶ Geomatic Engineering Applications

## HOW TO SUBMIT

---

More information about the conference, such as deadlines and registration categories, can be accessed at <https://bcee.uotechnology.edu.iq> or by email [bcee@uotechnology.edu.iq](mailto:bcee@uotechnology.edu.iq) (Conference Office).
